# Supplementary material for: Association between High Lipid Burden of Target Lesion and Slow TIMI Flow in Coronary Interventions
Source: MDPI journal article supplement (doi:10.3390/jcm11185401), 2022-09-14
Supplement: s1 [file s1]

## Supplementary Materials

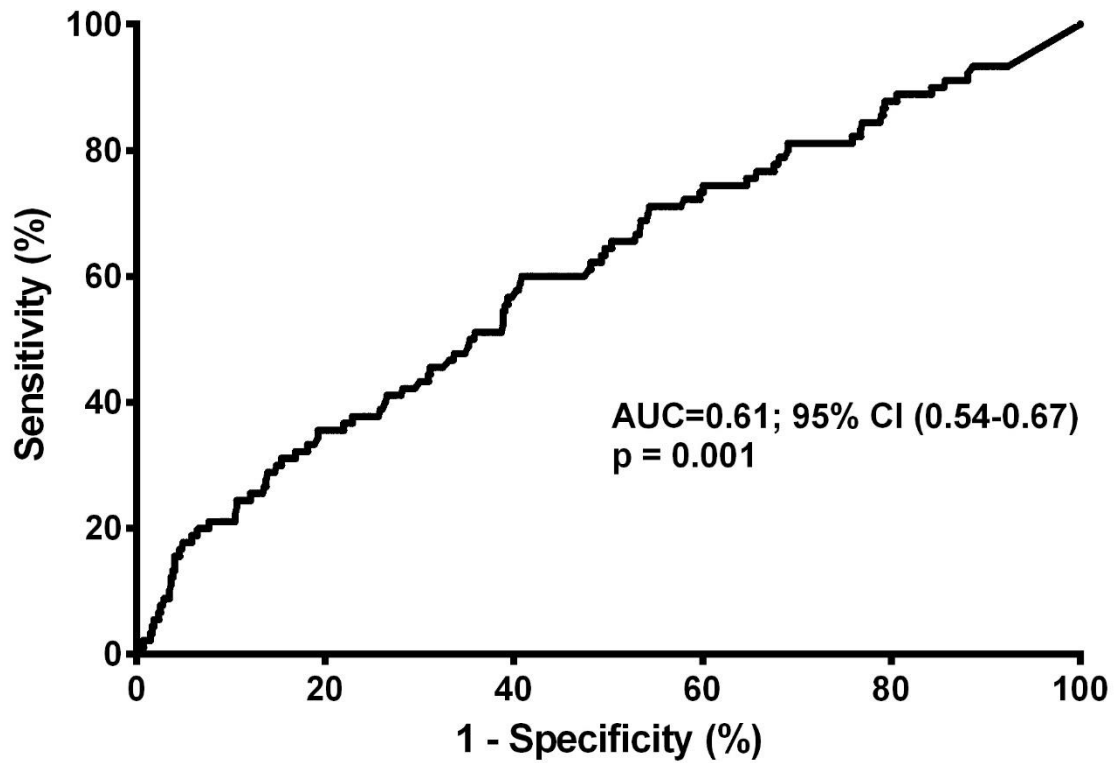

**Supplementary Figure S1.** Receiver-operating characteristic curve for maxLCBI<sub>4mm</sub> and TIMI flow. maxLCBI<sub>4mm</sub>: maximal lipid core burden index over any 4 mm length TIMI: thrombolysis in myocardial infarction

**Supplementary Table S1.** Association between TIMI flow and clinical characteristics, using LCBI cut-off as  $\geq 400$ .

|                                     | Univariable |           |         | Multivariable |           |         |
|-------------------------------------|-------------|-----------|---------|---------------|-----------|---------|
|                                     | OR          | 95% CI    | p-Value | OR            | 95% CI    | p-Value |
| <b>Clinical characteristics</b>     |             |           |         |               |           |         |
| Male sex                            | 3.23        | 1.63-6.39 | 0.001   | 5.55          | 1.54-19.8 | 0.009   |
| Age                                 | 1.00        | 0.98-1.02 | 0.875   | 1.02          | 0.98-1.05 | 0.364   |
| Hypertension                        | 0.62        | 0.40-0.97 | 0.036   | 0.49          | 0.25-0.95 | 0.034   |
| Diabetes                            | 0.60        | 0.36-1.00 | 0.053   | 0.66          | 0.32-1.39 | 0.277   |
| Dyslipidemia                        | 0.589       | 0.30-1.14 | 0.114   | 1.13          | 0.46-2.79 | 0.79    |
| Current smoker                      | 1.76        | 1.02-3.03 | 0.042   | 1.58          | 0.71-3.53 | 0.266   |
| Congestive heart failure            | 1.40        | 0.52-3.80 | 0.510   |               |           |         |
| Hx of CVD                           | 1.12        | 0.58-2.17 | 0.739   |               |           |         |
| Hx of PCI                           | 0.79        | 0.36-1.71 | 0.551   |               |           |         |
| Hx of CABG                          | 0.00        |           |         |               |           |         |
| FHx of CAD                          | 0.62        | 0.28-1.41 | 0.256   |               |           |         |
| Presentation as ACS                 | 1.34        | 0.85-2.10 | 0.205   |               |           |         |
| <b>Angiographic characteristics</b> |             |           |         |               |           |         |
| Complex lesion                      | 0.70        | 0.44-1.10 | 0.081   | 0.63          | 0.32-1.22 | 0.169   |
| LM disease                          | 1.86        | 0.87-3.99 | 0.109   | 4.99          | 1.09-22.8 | 0.038   |
| pre-PCI<br>maxLCBI4mm $\geq 400$    | 1.74        | 1.11-2.73 | 0.016   | 2.21          | 1.14-4.29 | 0.019   |
| <b>Device selection</b>             |             |           |         |               |           |         |
| Balloon diameter                    | 0.90        | 0.38-2.11 | 0.811   |               |           |         |
| Balloon length                      | 1.18        | 1.06-1.31 | 0.003   | 1.09          | 0.95-1.24 | 0.224   |
| Stent diameter                      | 1.07        | 0.93-1.23 | 0.350   |               |           |         |
| Stent length                        | 1.05        | 0.98-1.01 | 0.384   |               |           |         |
| Post-balloon diameter               | 1.57        | 0.97-2.54 | 0.066   | 1.50          | 0.60-3.74 | 0.385   |
| Post-balloon length                 | 1.01        | 0.93-1.10 | 0.744   |               |           |         |
| <b>IVUS parameter</b>               |             |           |         |               |           |         |
| Reference diameter                  | 1.27        | 0.90-1.81 | 0.175   | 1.32          | 0.58-3.03 | 0.509   |
| Minimal luminal diamete             | 0.46        | 0.24-0.90 | 0.024   | 0.248         | 0.08-0.81 | 0.021   |
| Minimal lumen area                  | 1.00        | 0.96-1.04 | 0.862   |               |           |         |
| Area of stenosis                    | 1.04        | 1.01-1.07 | 0.003   | 1.06          | 0.96-1.16 | 0.241   |
| Lesion length                       | 1.01        | 0.99-1.03 | 0.192   | 1.00          | 0.98-1.03 | 0.837   |
| Minimal stent diameter              | 1.34        | 0.92-1.97 | 0.131   | 0.81          | 0.29-2.24 | 0.685   |
